# Supplementary material
Source: PubMed Central journal article supplement (PMC8321537)
Supplement: msab118_supplementary_data.pdf [file msab118_supplementary_data.pdf]

Supplementary Table 1. SARS-CoV-2 variants in the 68KG dataset.

| Mutant (major) | Mutant (minor) | Gene   | Genomic Position | Nucleotide change | Amino acid change | Time (days) | Variant Frequency | Genomes mapped | First location            |
|----------------|----------------|--------|------------------|-------------------|-------------------|-------------|-------------------|----------------|---------------------------|
| $\mu_1$        |                | ORF1ab | 2416             | U>C               |                   | 0           | 98.4%             | 0              | China, Asia               |
| $\mu_2$        |                | ORF1ab | 19524            | U>C               |                   | 0           | 99.0%             | 18             | China, Asia               |
| $\mu_3$        |                | S      | 23929            | U>C               |                   | 0           | 98.9%             | 0              | China, Asia               |
| $\mu_4$        |                | ORF1ab | 15933            | U>C               |                   | 0           | 98.8%             | 0              | China, Asia               |
| $\mu_5$        |                | ORF8   | 27944            | U>C               |                   | 0           | 97.0%             | 0              | China, Asia               |
| $\mu_6$        |                | ORF1ab | 6286             | U>C               |                   | 0           | 95.6%             | 0              | China, Asia               |
| $\mu_7$        |                | S      | 22444            | U>C               |                   | 0           | 98.7%             | 0              | China, Asia               |
| $\alpha_1$     |                | ORF1ab | 18060            | U>C               |                   | 0           | 97.3%             | 1114           | China, Asia               |
|                | $\alpha_{1a}$  | N      | 28657            | C>U               |                   | 63          | 1.0%              | 3              | France, Europe            |
|                | $\alpha_{1b}$  | ORF1ab | 9477             | U>A               | F>Y               | 63          | 0.7%              | 3              | France, Europe            |
|                | $\alpha_{1c}$  | N      | 28863            | C>U               | S>L               | 63          | 0.7%              | 7              | France, Europe            |
|                | $\alpha_{1d}$  | ORF3a  | 25979            | G>U               | G>V               | 63          | 0.7%              | 451            | France, Europe            |
| $\alpha_2$     |                | ORF1ab | 8782             | U>C               |                   | 0           | 94.9%             | 51             | China, Asia               |
| $\alpha_3$     |                | ORF8   | 28144            | C>U               | S>L               | 0           | 94.9%             | 1281           | China, Asia               |
|                | $\alpha_{3a}$  | ORF1ab | 1606             | U>C               |                   | 43          | 0.9%              | 578            | United Kingdom, Europe    |
|                | $\alpha_{3b}$  | ORF1ab | 11083            | G>U               | L>F               | 24          | 7.5%              | 417            | China, Asia               |
|                | $\alpha_{3c}$  | N      | 28311            | C>U               | P>L               | 64          | 1.4%              | 4              | South Korea, Asia         |
|                | $\alpha_{3d}$  | ORF1ab | 13730            | C>U               | A>V               | 33          | 1.4%              | 5              | China, Asia               |
|                | $\alpha_{3e}$  | ORF1ab | 6312             | C>A               | T>K               | 71          | 1.2%              | 767            | Taiwan, Asia              |
|                | $\alpha_{3f}$  | ORF3a  | 26144            | G>U               | G>V               | 28          | 3.0%              | 160            | China, Asia               |
|                | $\alpha_{3g}$  | ORF1ab | 14805            | C>U               |                   | 54          | 3.7%              | 511            | United Kingdom, Europe    |
|                | $\alpha_{3h}$  | ORF1ab | 17247            | U>C               |                   | 64          | 1.0%              | 682            | Switzerland, Europe       |
|                | $\alpha_{3i}$  | ORF1ab | 2558             | C>U               | P>S               | 54          | 1.0%              | 44             | United Kingdom, Europe    |
|                | $\alpha_{3j}$  | ORF1ab | 2480             | A>G               | I>V               | 54          | 1.0%              | 648            | United Kingdom, Europe    |
| $\beta_1$      |                | ORF1ab | 3037             | C>U               |                   | 31          | 87.2%             | 45             | China, Asia               |
| $\beta_2$      |                | S      | 23403            | A>G               | D>G               | 31          | 87.2%             | 15             | China, Asia               |
| $\beta_3$      |                | ORF1ab | 14408            | C>U               | P>L               | 41          | 87.1%             | 4450           | Saudi Arabia, Middle East |
|                | $\beta_{3a}$   | ORF1ab | 20268            | A>G               |                   | 64          | 6.0%              | 2388           | Italy, Europe             |
|                | $\beta_{3b}$   | N      | 28854            | C>U               | S>L               | 29          | 4.5%              | 1782           | China, Asia               |
|                | $\beta_{3c}$   | ORF1ab | 15324            | C>U               |                   | 29          | 2.2%              | 1463           | China, Asia               |
|                | $\beta_{3d}$   | ORF3a  | 25429            | G>U               | V>L               | 77          | 1.1%              | 719            | United Kingdom, Europe    |
|                | $\beta_{3e}$   | N      | 28836            | C>U               | S>L               | 74          | 0.8%              | 3              | Switzerland, Europe       |
|                | $\beta_{3f}$   | ORF1ab | 13862            | C>U               | T>I               | 74          | 0.8%              | 85             | Switzerland, Europe       |
|                | $\beta_{3g}$   | ORF1ab | 10798            | C>A               |                   | 86          | 0.6%              | 435            | United Kingdom, Europe    |
| $\gamma_1$     |                | ORF3a  | 25563            | G>U               | Q>H               | 41          | 24.4%             | 1671           | Saudi Arabia, Middle East |
|                | $\gamma_{1a}$  | ORF1ab | 18877            | C>U               |                   | 41          | 4.2%              | 1201           | Saudi Arabia, Middle East |
|                | $\gamma_{1b}$  | M      | 26735            | C>U               |                   | 41          | 2.7%              | 1784           | Saudi Arabia, Middle East |
| $\delta_1$     |                | ORF1ab | 1059             | C>U               | T>I               | 54          | 17.6%             | 8284           | Singapore, Asia           |
|                | $\delta_{1a}$  | S      | 24368            | G>U               | D>Y               | 75          | 0.7%              | 466            | Sweden, Europe            |
|                | $\delta_{1b}$  | ORF8   | 27964            | C>U               | S>L               | 76          | 2.9%              | 1152           | USA, North America        |
|                | $\delta_{1c}$  | ORF1ab | 11916            | C>U               | S>L               | 72          | 1.9%              | 807            | USA, North America        |
|                | $\delta_{1d}$  | ORF1ab | 18998            | C>U               | A>V               | 72          | 0.7%              | 458            | USA, North America        |
|                | $\delta_{1e}$  | ORF1ab | 10319            | C>U               | L>F               | 76          | 1.2%              | 799            | USA, North America        |
| $\zeta_1$      |                | ORF1ab | 445              | U>C               |                   | 179         | 4.4%              | 18             | Netherlands, Europe       |
| $\zeta_2$      |                | M      | 26801            | C>G               |                   | 82          | 4.3%              | 7              | Canada, North America     |
| $\zeta_3$      |                | S      | 22227            | C>U               | A>V               | 84          | 4.5%              | 1              | Spain, Europe             |
| $\zeta_4$      |                | N      | 28932            | C>U               | A>V               | 96          | 4.4%              | 5              | Portugal, Europe          |
| $\zeta_5$      |                | ORF10  | 29645            | G>U               | V>L               | 78          | 4.4%              | 2              | Denmark, Europe           |
| $\zeta_6$      |                | ORF1ab | 21255            | G>C               |                   | 80          | 4.4%              | 1557           | USA, North America        |
| $\zeta_7$      |                | S      | 21614            | C>U               | L>F               | 79          | 2.5%              | 1442           | United Kingdom, Europe    |

**Supplementary Table 1.** SARS-CoV-2 variants in the 68KG dataset (continued).

| Mutant (major) | Mutant (minor)  | Gene   | Genomic Position | Nucleotide change | Amino acid change | Time (days) | Variant Frequency | Genomes mapped |
|----------------|-----------------|--------|------------------|-------------------|-------------------|-------------|-------------------|----------------|
| ε <sub>1</sub> |                 | N      | 28881            | G>A               | R>K               | 54          | 41.7%             | 5              |
| ε <sub>2</sub> |                 | N      | 28882            | G>A               | R>K               | 54          | 41.6%             | 0              |
| ε <sub>3</sub> |                 | N      | 28883            | G>C               | G>R               | 54          | 41.6%             | 13394          |
|                | ε <sub>3a</sub> | ORF1ab | 313              | C>U               |                   | 64          | 2.4%              | 1630           |
|                | ε <sub>3b</sub> | ORF1ab | 19839            | U>C               |                   | 64          | 2.9%              | 1227           |
|                | ε <sub>3c</sub> | M      | 27046            | C>U               | T>M               | 69          | 0.8%              | 548            |
|                | ε <sub>3d</sub> | ORF1ab | 10097            | G>A               | G>S               | 69          | 3.2%              | 11             |
|                | ε <sub>3e</sub> | S      | 23731            | C>U               |                   | 69          | 3.2%              | 425            |
|                | ε <sub>3f</sub> | N      | 28580            | G>U               | D>Y               | 69          | 1.0%              | 678            |
|                | ε <sub>3g</sub> | ORF1ab | 13536            | C>U               |                   | 69          | 1.6%              | 23             |
|                | ε <sub>3h</sub> | ORF1ab | 4002             | C>U               | T>I               | 69          | 1.6%              | 1066           |
|                | ε <sub>3i</sub> | ORF1ab | 10265            | G>A               | G>S               | 63          | 1.4%              | 879            |
|                | ε <sub>3j</sub> | S      | 21575            | C>U               | L>F               | 54          | 1.0%              | 248            |
|                | ε <sub>3k</sub> | S      | 21637            | C>U               |                   | 111         | 1.3%              | 873            |
|                | ε <sub>3l</sub> | ORF8   | 28169            | A>G               |                   | 103         | 1.3%              | 0              |
|                | ε <sub>3m</sub> | ORF1ab | 16968            | G>U               |                   | 114         | 1.0%              | 702            |
| η <sub>1</sub> |                 | ORF1ab | 1163             | A>U               | I>F               | 86          | 9.6%              | 339            |
|                | η <sub>1a</sub> | ORF1ab | 14202            | G>U               |                   | 159         | 1.1%              | 7              |
|                | η <sub>1b</sub> | ORF1ab | 19542            | G>U               | M>I               | 81          | 1.2%              | 23             |
|                | η <sub>1c</sub> | S      | 22388            | C>U               |                   | 90          | 1.2%              | 21             |
|                | η <sub>1d</sub> | N      | 29466            | C>U               | A>V               | 91          | 1.2%              | 4              |
|                | η <sub>1e</sub> | ORF1ab | 19718            | C>U               | T>I               | 73          | 1.5%              | 23             |
|                | η <sub>1f</sub> | ORF3a  | 26060            | C>U               | T>I               | 92          | 1.2%              | 7              |
|                | η <sub>1g</sub> | N      | 29227            | G>U               |                   | 55          | 1.2%              | 24             |
|                | η <sub>1h</sub> | ORF1ab | 3256             | U>C               |                   | 167         | 1.1%              | 0              |
|                | η <sub>1i</sub> | ORF1ab | 5622             | C>U               | P>L               | 67          | 1.2%              | 775            |
| η <sub>2</sub> |                 | ORF1ab | 18555            | C>U               |                   | 51          | 8.0%              | 25             |
| η <sub>3</sub> |                 | ORF1ab | 16647            | G>U               |                   | 84          | 8.0%              | 8              |
| η <sub>4</sub> |                 | ORF1ab | 7540             | U>C               |                   | 86          | 7.9%              | 0              |
| η <sub>5</sub> |                 | S      | 23401            | G>A               |                   | 86          | 7.9%              | 1              |
| η <sub>6</sub> |                 | S      | 22992            | G>A               | S>N               | 86          | 8.5%              | 4583           |
|                | η <sub>6a</sub> | S      | 22480            | C>U               |                   | 66          | 1.3%              | 878            |
| v <sub>1</sub> |                 | ORF1ab | 17858            | A>G               | Y>C               | 59          | 2.6%              | 61             |
| v <sub>2</sub> |                 | ORF1ab | 17747            | C>U               | P>L               | 59          | 2.5%              | 1677           |

Note.- Genomic locations correspond to those of the NCBI genome (GenBank ID: NC\_04551.2). Amino acid changes are shown for nonsynonymous variants.

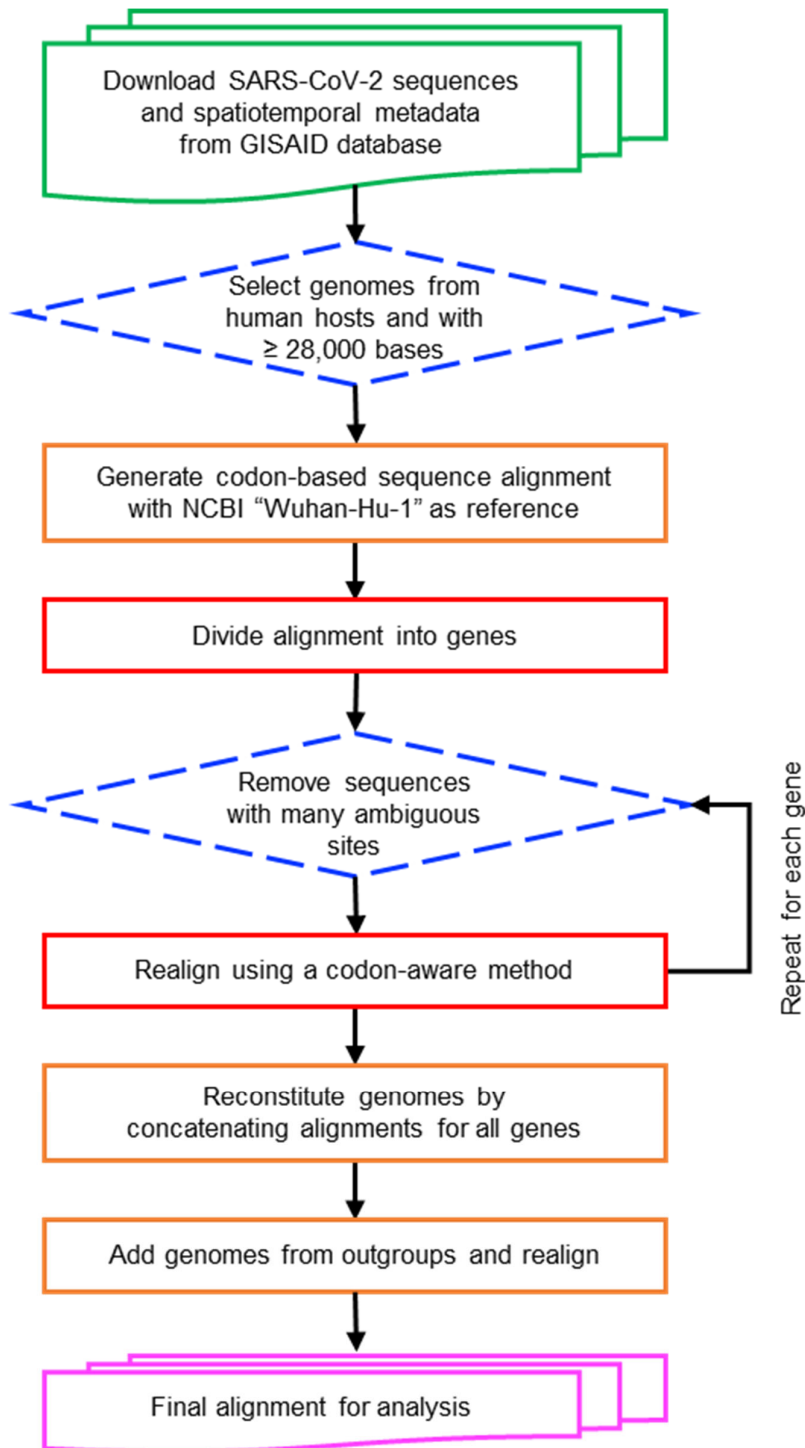

**Supplementary Figure 1.** Flowchart summarizing the procedure to generate two curated multiple sequence alignments used in this study (29KG and 68KG) from the SARS-CoV-2 genomes available in the GISAID database. Abbreviations are as follows: GISAID (Global Initiative on Sharing Avian Influenza Data [<https://www.gisaid.org>]); NCBI (National Center for Biotechnology Information [<https://www.ncbi.nlm.nih.gov>]).

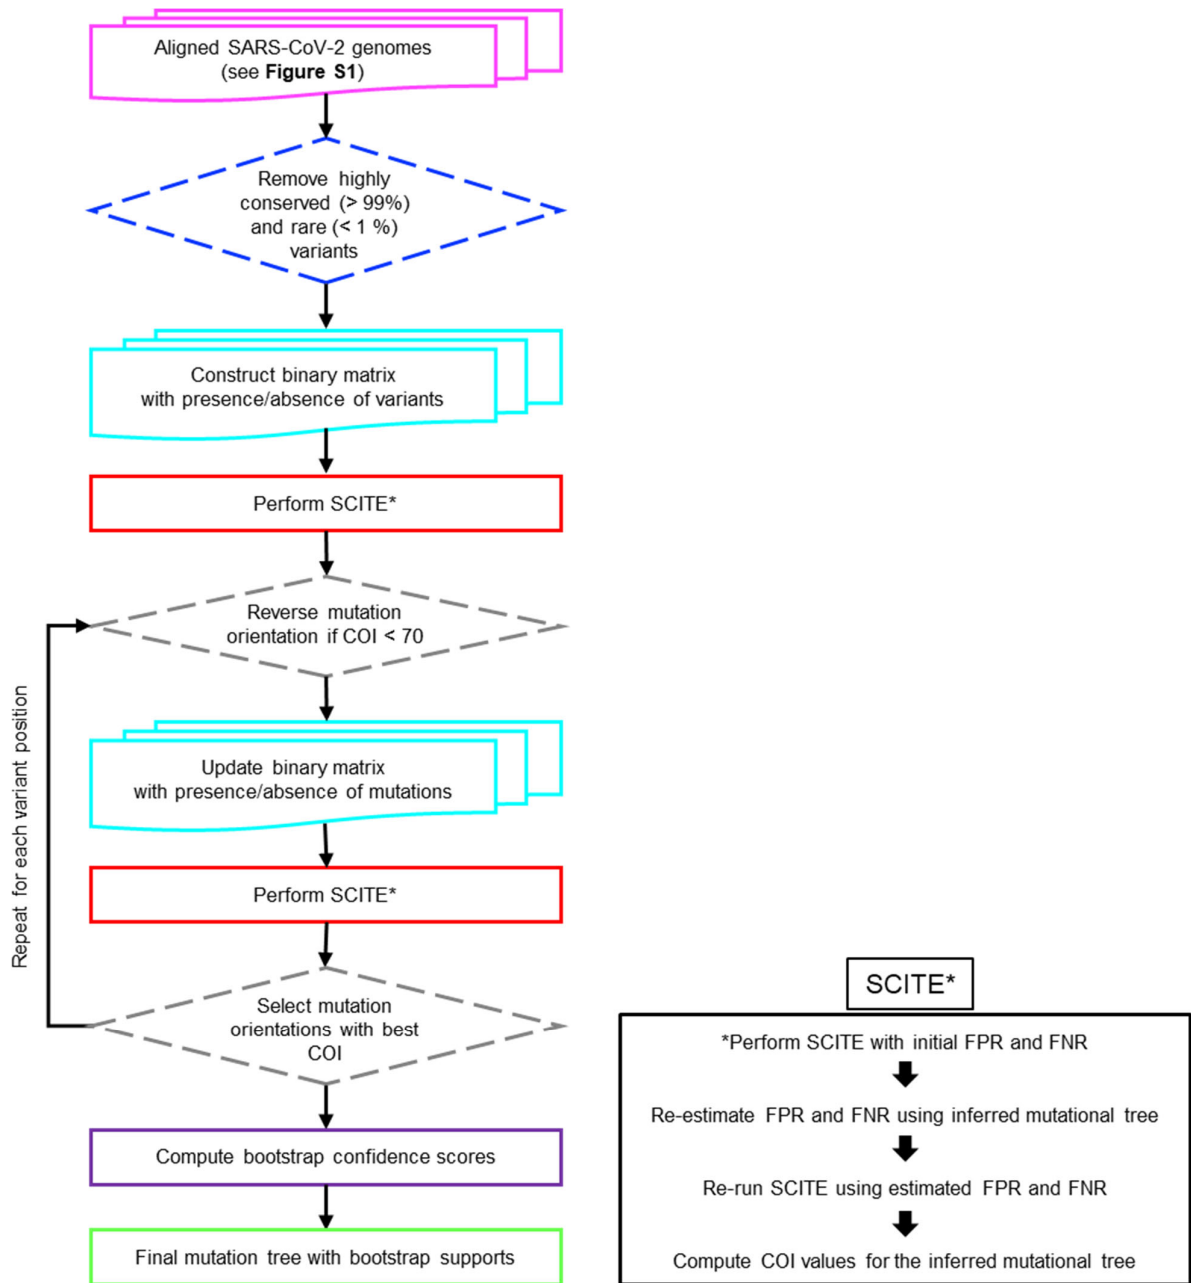

**Supplementary Figure 2.** Flowchart summarizing the steps performed to construct the mutation order tree from the curated SARS-CoV-2 alignments (i.e., 29KG and 68KG). Abbreviations are as follows: GISAID (Global Initiative on Sharing Avian Influenza Data); SCITE (Single Cell Inference of Tumor Evolution); FPR (False Positive Rates); FNR (False Negative Rates); COI (Co-Occurrence Index).



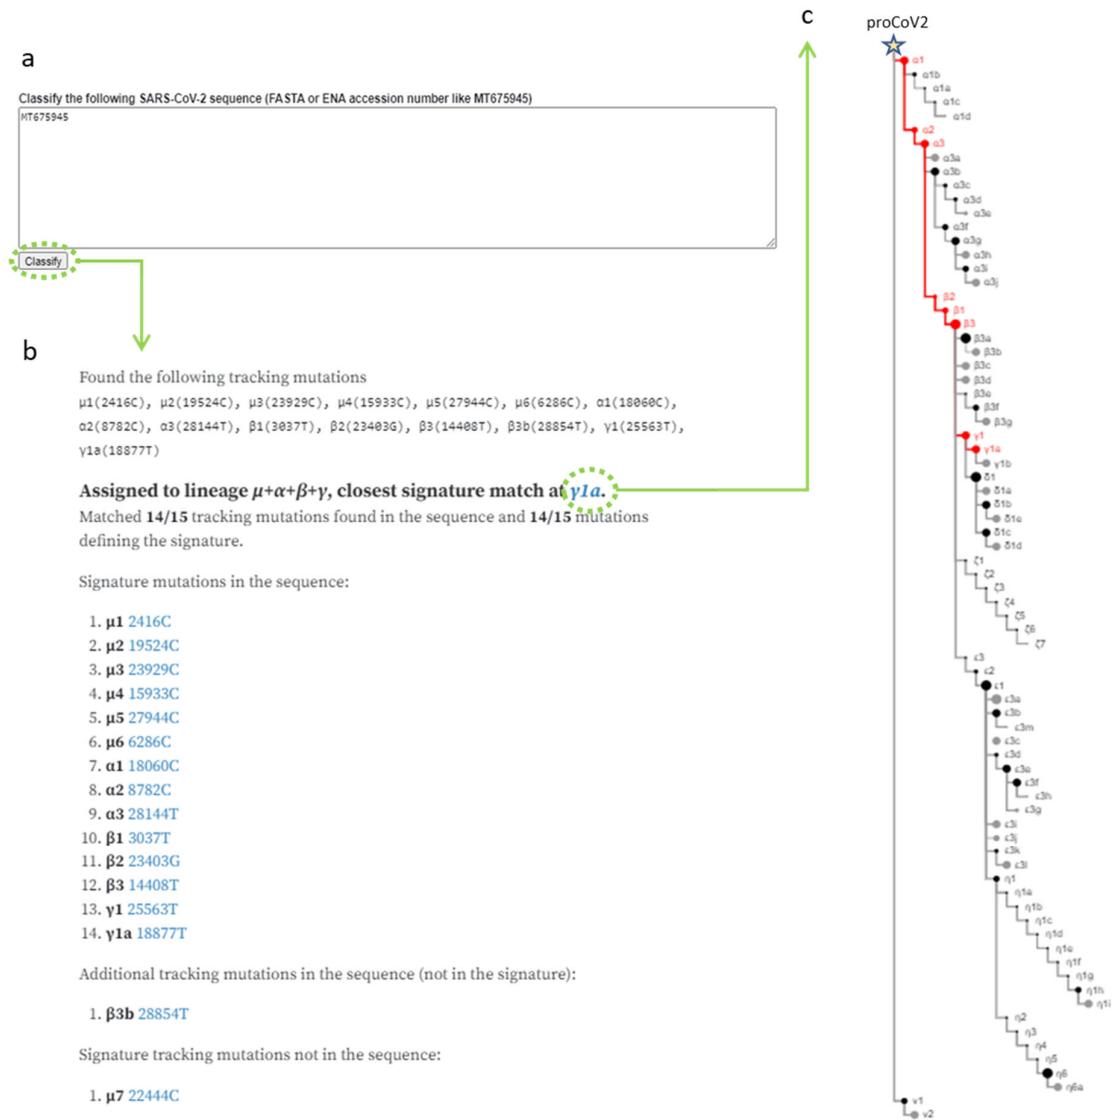

**Supplementary Figure 4.** An example of sequence classification (ENA Accession MT675945) based on the 84 signature mutations (<http://sars2evo.datamonkey.org/>; “Classify your Sequence” option). (a) Input window to provide identifiers of sequences to be classified (e.g., MT675945). (b) The input sequence is classified into a mutational fingerprint. A list of mutations that are appeared in the input sequence is shown in the output window. (c) A waterfall phylogeny shows the input sequence's location in the phylogeny, which appears after clicking the closet signature matched mutation in panel b.
